# Supplementary material
Source: PubMed Central journal article supplement (PMC4747887)

**Supplementary Table S1.** Correlation between p-STAT3 expression and the clinicopathological characteristics

| Variables                         | Number of Patients | p-STAT3 expression |          | $\chi^2$ | * <i>P</i> -value |
|-----------------------------------|--------------------|--------------------|----------|----------|-------------------|
|                                   |                    | Low/none(%)        | High(%)  |          |                   |
| <b>Gender</b>                     |                    |                    |          |          |                   |
| Female                            | 72                 | 31(43.1)           | 31(56.9) | 2.914    | 0.088             |
| Male                              | 122                | 68(55.7)           | 54(44.3) |          |                   |
| <b>Age (years)</b>                |                    |                    |          |          |                   |
| <60                               | 101                | 48(47.5)           | 53(52.5) | 1.036    | 0.309             |
| ≥60                               | 93                 | 51(54.8)           | 42(45.2) |          |                   |
| <b>Smoking index</b>              |                    |                    |          |          |                   |
| <400                              | 95                 | 42(44.2)           | 53(55.8) | 3.465    | 0.063             |
| ≥400                              | 99                 | 57(57.6)           | 42(42.4) |          |                   |
| <b>Clinical Stage</b>             |                    |                    |          |          |                   |
| I                                 | 84                 | 47(56.0)           | 37(44.0) | 1.898    | 0.594             |
| II                                | 43                 | 21(48.8)           | 22(51.2) |          |                   |
| IIIa                              | 54                 | 26(48.1)           | 28(51.9) |          |                   |
| IIIb                              | 13                 | 5(38.5)            | 8(61.5)  |          |                   |
| <b>Tumor size</b>                 |                    |                    |          |          |                   |
| ≤3cm                              | 92                 | 44(47.8)           | 48(52.2) | 0.719    | 0.396             |
| >3cm                              | 102                | 55(53.9)           | 47(46.1) |          |                   |
| <b>Regional LN metastasis</b>     |                    |                    |          |          |                   |
| No                                | 107                | 62(57.9)           | 45(42.1) | 4.563    | <b>0.033</b>      |
| Yes                               | 87                 | 37(42.5)           | 50(57.5) |          |                   |
| <b>Histology</b>                  |                    |                    |          |          |                   |
| AD                                | 101                | 47(46.5)           | 54(53.5) | 1.704    | 0.192             |
| SQ                                | 93                 | 52(55.9)           | 41(44.1) |          |                   |
| <b>Pathologic differentiation</b> |                    |                    |          |          |                   |
| Well                              | 64                 | 34(48.4)           | 30(51.6) | 0.168    | 0.682             |
| Poor                              | 130                | 65(50.0)           | 65(50.0) |          |                   |
| <b>c-Myc expression</b>           |                    |                    |          |          |                   |
| Low/ none                         | 93                 | 44(47.3)           | 49(52.7) | 0.989    | 0.320             |
| High                              | 101                | 55(54.5)           | 46(45.5) |          |                   |
| Total                             | 194                | 110(56.7)          | 84(43.3) |          |                   |

LN: lymph node. SQ: squamous cell carcinoma. AD: adenocarcinoma. \**P* values < 0.05 in bold.

**Supplementary Table S2.** Correlation between c-Myc expression and the clinicopathological characteristics

| Variables                  | Number of Patients | c-Myc expression |           | $\chi^2$ | P-value |
|----------------------------|--------------------|------------------|-----------|----------|---------|
|                            |                    | Low/none(%)      | High(%)   |          |         |
| Gender                     |                    |                  |           |          |         |
| Female                     | 72                 | 35(48.6)         | 37(51.4)  | 0.021    | 0.885   |
| Male                       | 122                | 58(47.5)         | 64(52.5)  |          |         |
| Age (years)                |                    |                  |           |          |         |
| <60                        | 101                | 49(48.5)         | 52(51.5)  | 0.028    | 0.867   |
| ≥60                        | 93                 | 44(47.3)         | 49(52.7)  |          |         |
| Smoking index              |                    |                  |           |          |         |
| <400                       | 95                 | 40(42.1)         | 55(57.9)  | 2.538    | 0.111   |
| ≥400                       | 99                 | 53(53.5)         | 46(46.5)  |          |         |
| Clinical Stage             |                    |                  |           |          |         |
| I                          | 84                 | 38(45.2)         | 46(54.8)  | 0.533    | 0.912   |
| II                         | 43                 | 22(51.2)         | 21(48.8)  |          |         |
| IIIa                       | 54                 | 27(50.0)         | 27(50.0)  |          |         |
| IIIb                       | 13                 | 6(46.2)          | 7(53.8)   |          |         |
| Tumor size                 |                    |                  |           |          |         |
| ≤3cm                       | 92                 | 41(44.6)         | 51(55.4)  | 0.798    | 0.372   |
| >3cm                       | 102                | 52(51.0)         | 50(49.0)  |          |         |
| Regional LN metastasis     |                    |                  |           |          |         |
| No                         | 107                | 48(44.9)         | 59(55.1)  | 0.906    | 0.341   |
| Yes                        | 87                 | 45(51.7)         | 42 (48.3) |          |         |
| Histology                  |                    |                  |           |          |         |
| AD                         | 101                | 47(46.5)         | 54(53.5)  | 0.166    | 0.683   |
| SQ                         | 93                 | 46(49.5)         | 47(50.5)  |          |         |
| Pathologic differentiation |                    |                  |           |          |         |
| Well                       | 64                 | 28(43.8)         | 36(56.2)  | 0.671    | 0.413   |
| Poor                       | 130                | 65(50.0)         | 65(50.0)  |          |         |
| Total                      | 194                | 93(47.9)         | 101(52.1) |          |         |

LN: lymph node. SQ: squamous cell carcinoma. AD: adenocarcinoma.

**Supplementary Figure S1.**

Kaplan-Meier OS and DFS curves for AD and SCC patients with (red line) or without (blue line) increases in PIM1 mRNA expression based on TCGA biospecimens and clinical data. (A) OS of AD patients; (B) DFS of AD patients; (C) OS of SCC patients; (D) DFS of SCC patients.

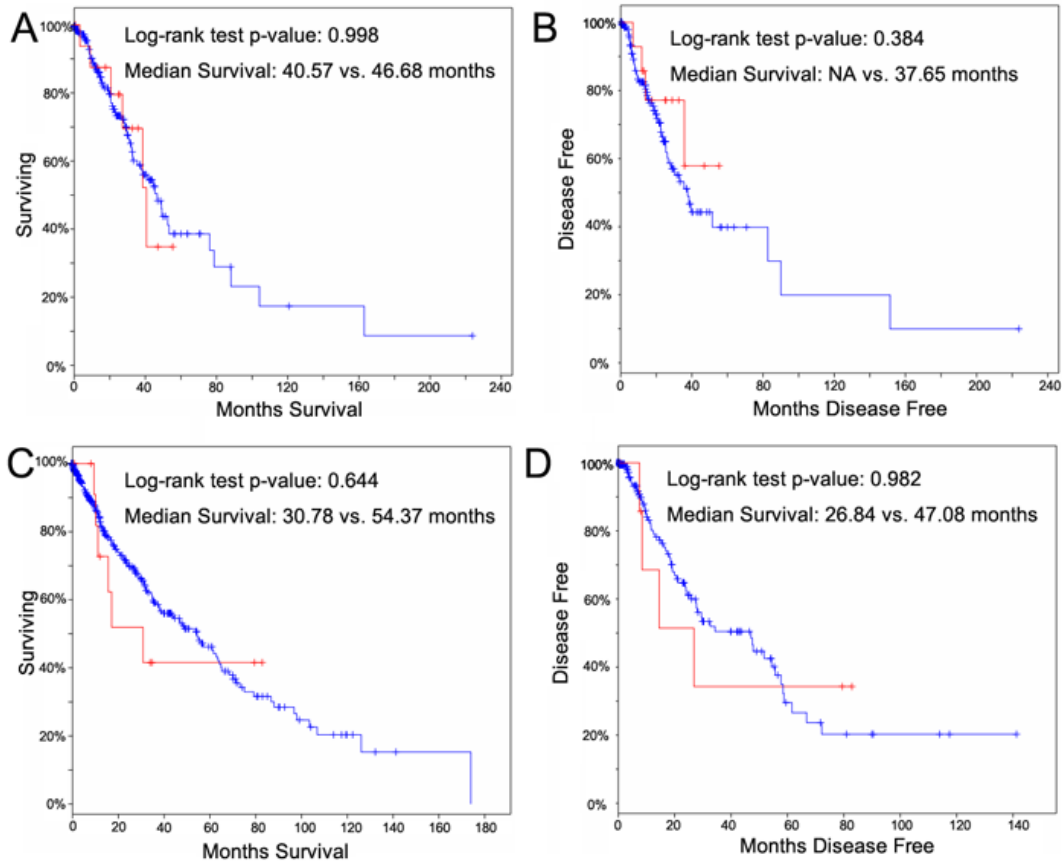

Supplement: jcav07p0324s1.pdf [file jcav07p0324s1.pdf]
